# Supplementary material for: Recognition of acrolein-specific epitopes by B cell receptors triggers an innate immune response
Source: PubMed Central journal article supplement (PMC8121969; doi:10.1016/j.jbc.2021.100648), 2021-04-09
Supplement: mmc1.pdf [file mmc1.pdf]

## Supporting information

### **Recognition of acrolein-specific epitopes by B cell receptors triggers an innate immune response**

Ryunosuke Endo<sup>1</sup>, Kazuki Uchiyama<sup>1</sup>, Sei-Young Lim<sup>1</sup>, Masanori Itakura<sup>1</sup>, Takahiro Adachi<sup>2</sup>, and Koji Uchida<sup>1,3,4</sup>

#### **Table of Contents**

Figure S1. Sorting of B cell subsets.

Figure S2. Representative flow-cytometry plots of the PerC B cells treated with biotin-BSA or biotin-acrBSA.

Figure S3. Representative flow-cytometry plots of PerC B-1a cells treated with biotin-BSA or biotin-acrBSA.

Figure S4. DNA and amino acid sequences of VH in IgM mAb RE-G25.

Figure S5. DNA and amino acid sequences of VL in IgM mAb RE-G25.

Figure S6. Sorting of acrolein-binding (ACR<sup>+</sup>) and acrolein-non-binding (ACR<sup>-</sup>) B cell populations from the PerC of BALB/c mice.

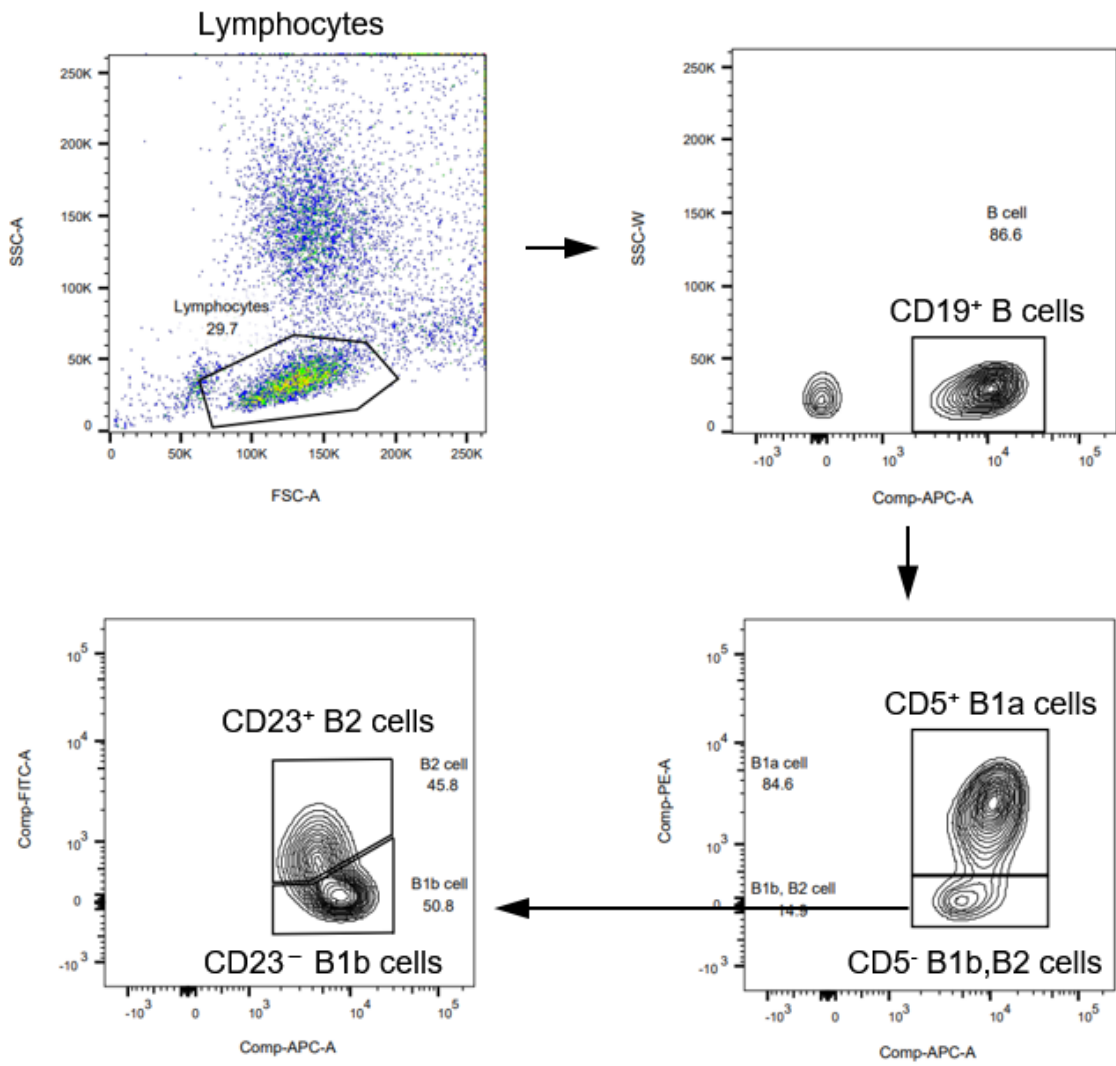

**Figure S1. Sorting of B cell subsets.**

B cell populations were defined as the total B cells (CD19<sup>+</sup>), B-2 cells (CD19<sup>+</sup>CD5<sup>-</sup>CD23<sup>+</sup>), B-1a cells (CD19<sup>+</sup>CD5<sup>+</sup>), and B-1b cells (CD19<sup>+</sup>CD5<sup>-</sup>CD23<sup>-</sup>).

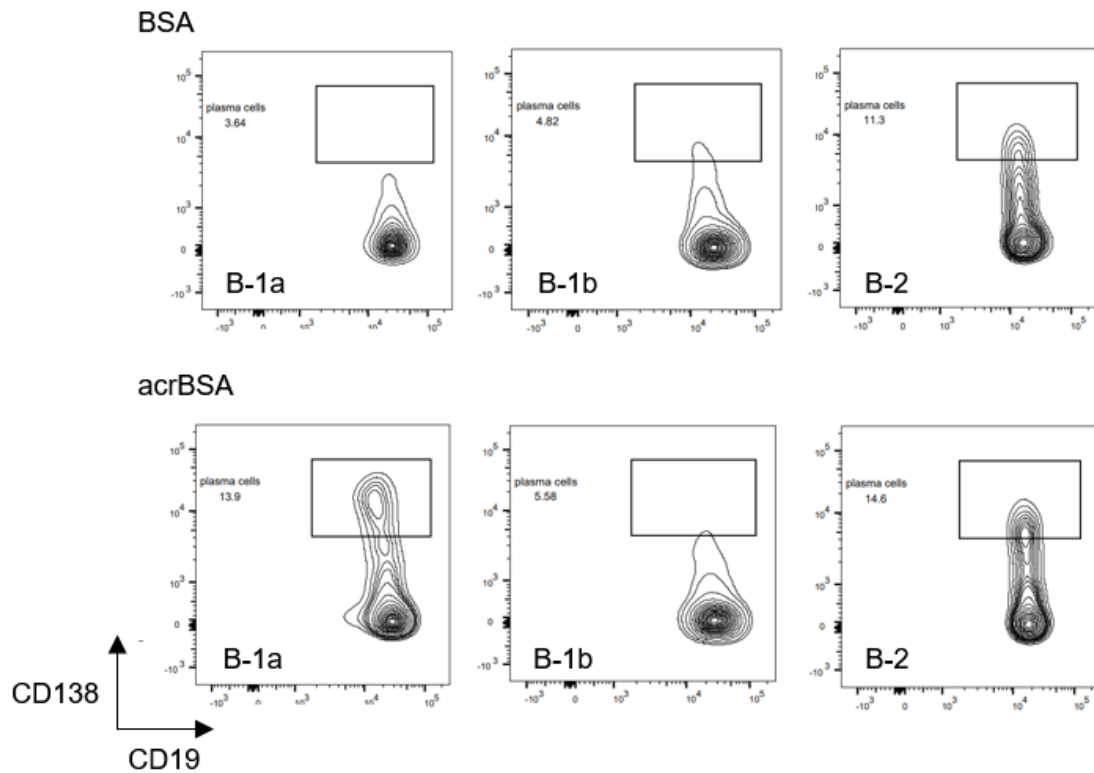

**Figure S2. Representative flow-cytometry plots of the PerC B cells treated with biotin-BSA or biotin-acrBSA.**

The PerC cells that had been treated with biotin-BSA (*upper three panels*) or biotin-acrBSA (*lower three panels*) for 72 h were sorted into the B cell subsets (B-1a, B-1b, and B-2 cells) and the changes in the number of plasma cells were measured. The gated B cell populations were stained for CD19 (anti-mouse CD19-APC) versus CD138 (anti-mouse CD138-FITC-PECy7).

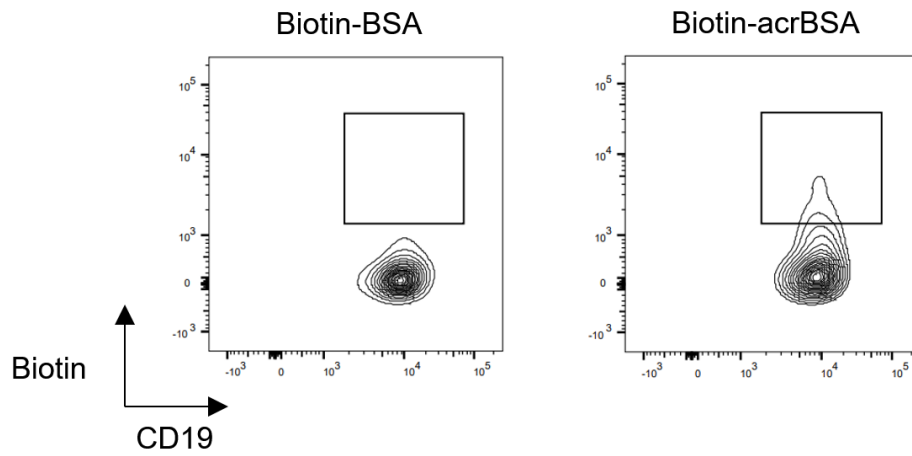

**Figure S3. Representative flow-cytometry plots of PerC B-1a cells treated with biotin-BSA or biotin-acrBSA.**

The PerC cells treated with biotin-BSA (*left*) or biotin-acrBSA (*right*) for 72 h were sorted into the B-1a cells and the changes in the number of antigen-binding cells were measured. The gated B-1a cell populations were stained for CD19 (anti-mouse CD19-APC) versus biotin (anti-mouse SA-PECy7).

VH: base sequence

```
GAGGTGCAGCTGGTGGAGTCTGGGGGAGACTTAGTGAAGCCTGGAGGGTC
CCTGAAACTCTCCTGTGCAGCCTCTGGATTCACCTTTCAGTAGCTATGGCA
TGTCCTGGGTTTCGCCAGACTCCAGACAAGAGGCTGGAGTGGGTCGCAACC
ATTAGTAGTGGTGGTAGTTACACCTACTATCCAGACAGTGTGAAGGGGCG
ATTCACCATCTCCAGAGACAATGCCAAGAACACCCTGTACCTGCAAATGA
GCAGTCTGAAGTCTGAGGACACAGCCATGTATTACTGTGCAAGACATGAT
TACGACTACTGGGGCCAAGGCACCACTCTCACAGTCTCCTCAG
```

VH: amino acid sequence

```
EVQLVESGGDLVKPGGSLKLSCAASCDR1SGFTFSSYGMSWVRQTPDKRLEWVAT
CDR2ISSGGSYTYYPDSVKGRFTISRDNKNTLYLQMSSLKSEDTAMYYCDR3CARHD
YDYWGQGTTLTVSS
```

**Figure S4. DNA and amino acid sequences of VH in IgM mAb RE-G25.** The CDRs are highlighted.

VL: base sequence

GACATCCAGATGAACCAGTCTCCATCCAGTCTGTCTGCATCCCTTGGAGA  
CACAATTACCATCACTTGCCATGCCAGTCAGAACATTAATGTTTGGTTAA  
GCTGGTACCAGCAGAAACCAGGAAATATTCCTAAACTATTGATCTATAAG  
GCTTCCAACCTTGCACACAGGCGTCCCATCAAGGTTTAGTGGCAGTGGATC  
TGGAACAGGTTTTCACATTAACCATCAGCAGCCTGCAGCCTGAAGACATTG  
CCTTACTACTGTCAACAGGGTCAAAGTTATCCTCTCACGTTTCGGTGCT  
GGGACCAAGCTGGAAATAAAAC

VL: amino acid sequence

D I Q M N Q S P S S L S A S L G D T I T I T C H A <sup>CDR1</sup> S Q N I N V W L S W Y Q Q K P G N I P K L L I Y K <sup>CDR2</sup>  
<sup>CDR3</sup> A S N L H T G V P S R F S G S G S G T G F T L T I S S L Q P E D I A T Y Y C Q Q G Q S Y P L T F G A  
G T K L E I K

**Figure S5. DNA and amino acid sequences of VL in IgM mAb RE-G25.** The CDRs are highlighted.

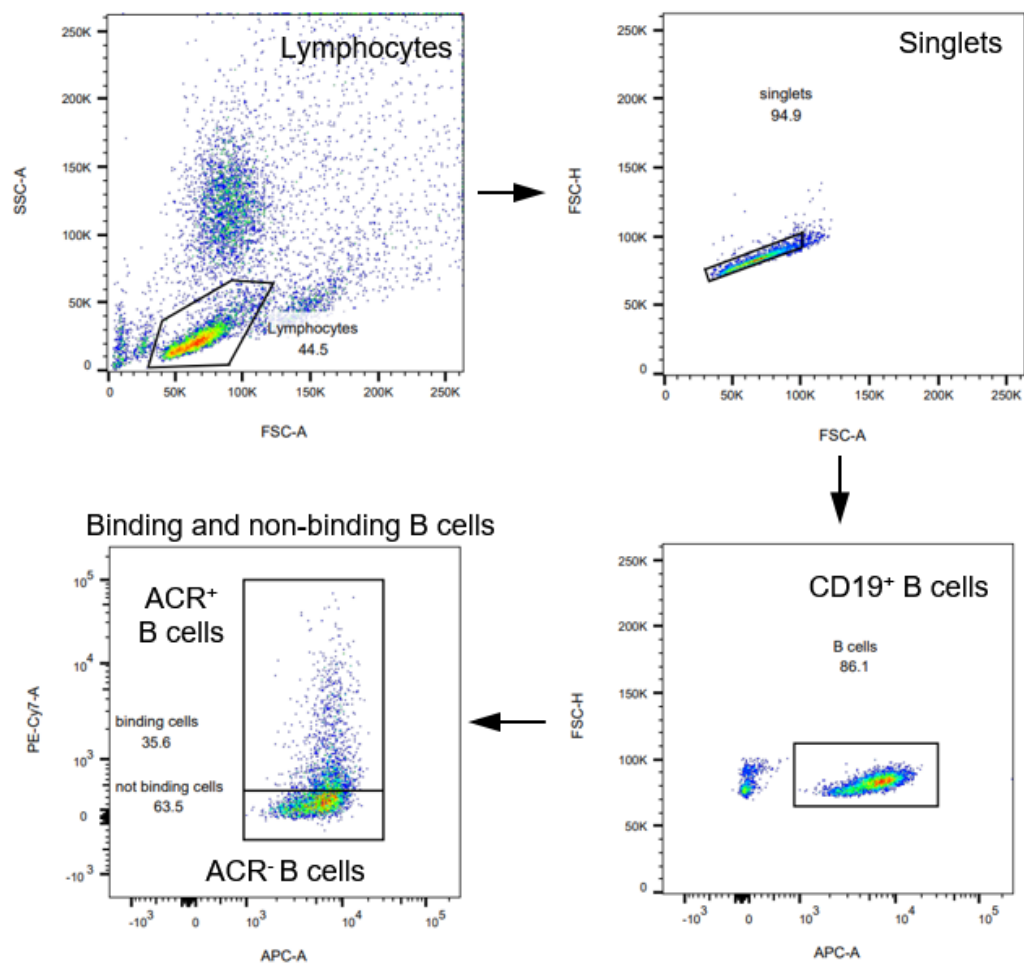

**Figure S6. Sorting of acrolein-binding (ACR<sup>+</sup>) and acrolein-non-binding (ACR<sup>-</sup>) B cell populations from the PerC of BALB/c mice.**
